# Supplementary material for: Hypermethylation of the Gene Body in SRCIN1 Is Involved in Breast Cancer Cell Proliferation and Is a Potential Blood-Based Biomarker for Early Detection and a Poor Prognosis
Source: MDPI journal article supplement (doi:10.3390/biom14050571), 2024-05-12
Supplement: s1 [file s1]

# **Hypermethylation of gene body in *SRCIN1* involved in breast cancer cell proliferation with potential as a blood-based biomarker for early detection and poor prognosis**

Hsieh-Tsung Shen<sup>1,2</sup>, Clilia Davis<sup>3</sup>, Chih-Ming Su<sup>4,5</sup>, Li-Min Liao<sup>5</sup>, Hsiu-Ming Shih<sup>1</sup>,  
Kuan-Der Lee<sup>1</sup>, Chin-Sheng Hung<sup>2,4,5,6\*</sup>, Muhamad Ansar<sup>7\*</sup>, and Ruo-Kai Lin<sup>1,2,3,7,8,9\*</sup>

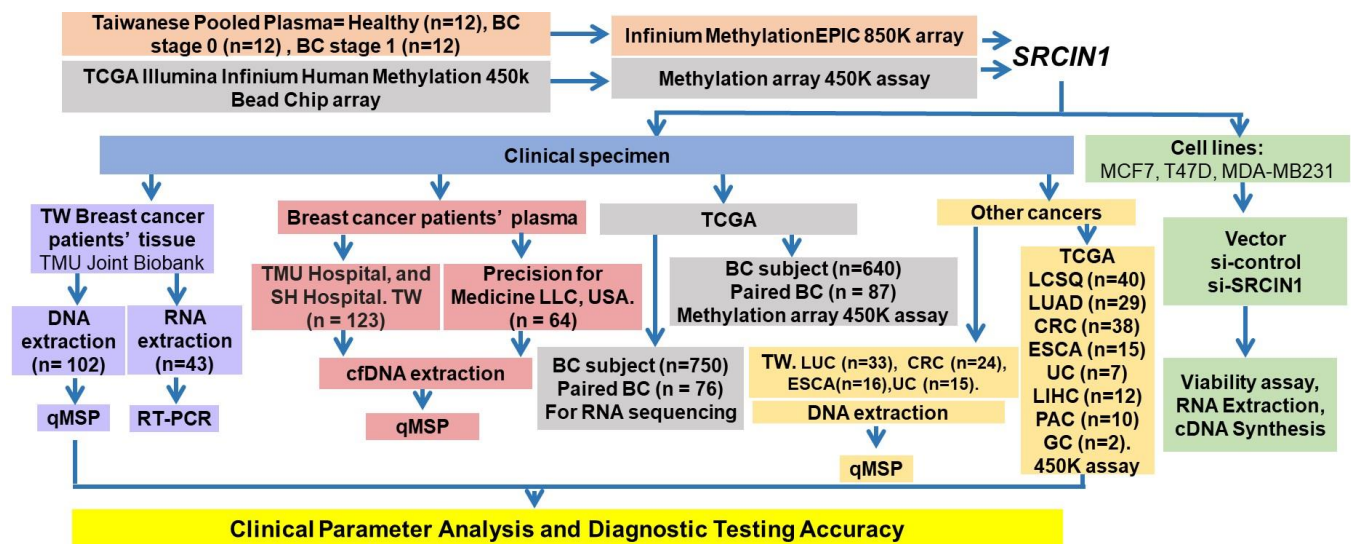

**Figure S1.** Flowchart of the study design, datasets, and specimens used. For each step, the sample types and number of samples used for the analyses are indicated. TW, Taiwan; TCGA, The Cancer Genome Atlas; BC, Breast Cancer; AN, adjacent normal; CRC, colorectal cancer; LCSQ, lung squamous cell carcinoma; lung adenocarcinoma; ESCA, esophageal cancer; UC, Uterine Cancer; LIHC, Liver Cancer; PAC, Pancreatic Cancer, cfDNA, circulating cell-free DNA; QMSP, quantitative methylation-specific PCR; qRT-PCR, quantitative reverse-transcription PCR, methylation450K array, Illumina Infinium HumanMethylation450 BeadChip array. methylation480K array, Illumina Infinium HumanMethylation850 BeadChip array.

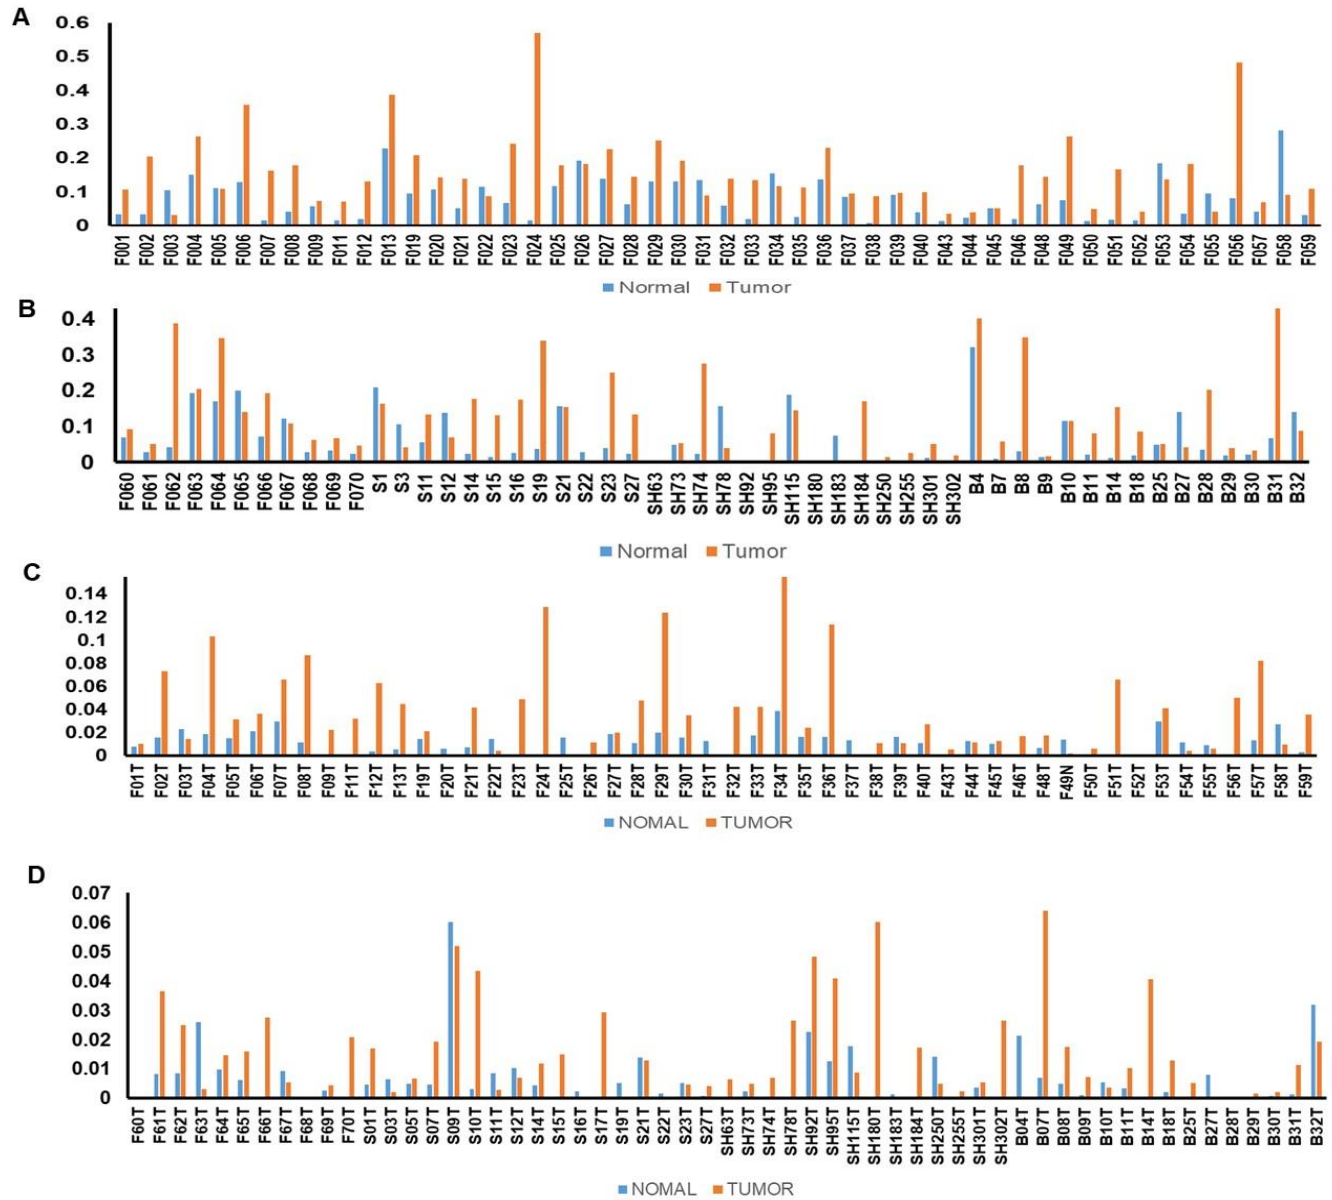

**Figure S2.** *SRCIN1* methylation level in Taiwanese breast cancer patients: (A)(B)(C)(D) Levels of methylated *SRCIN1* were determined using quantitative methylation-specific polymerase chain reaction (QMSP) in tumor tissue and adjacent normal tissue samples from 102 Taiwanese patients with breast cancer. ACTB was used as the internal control.

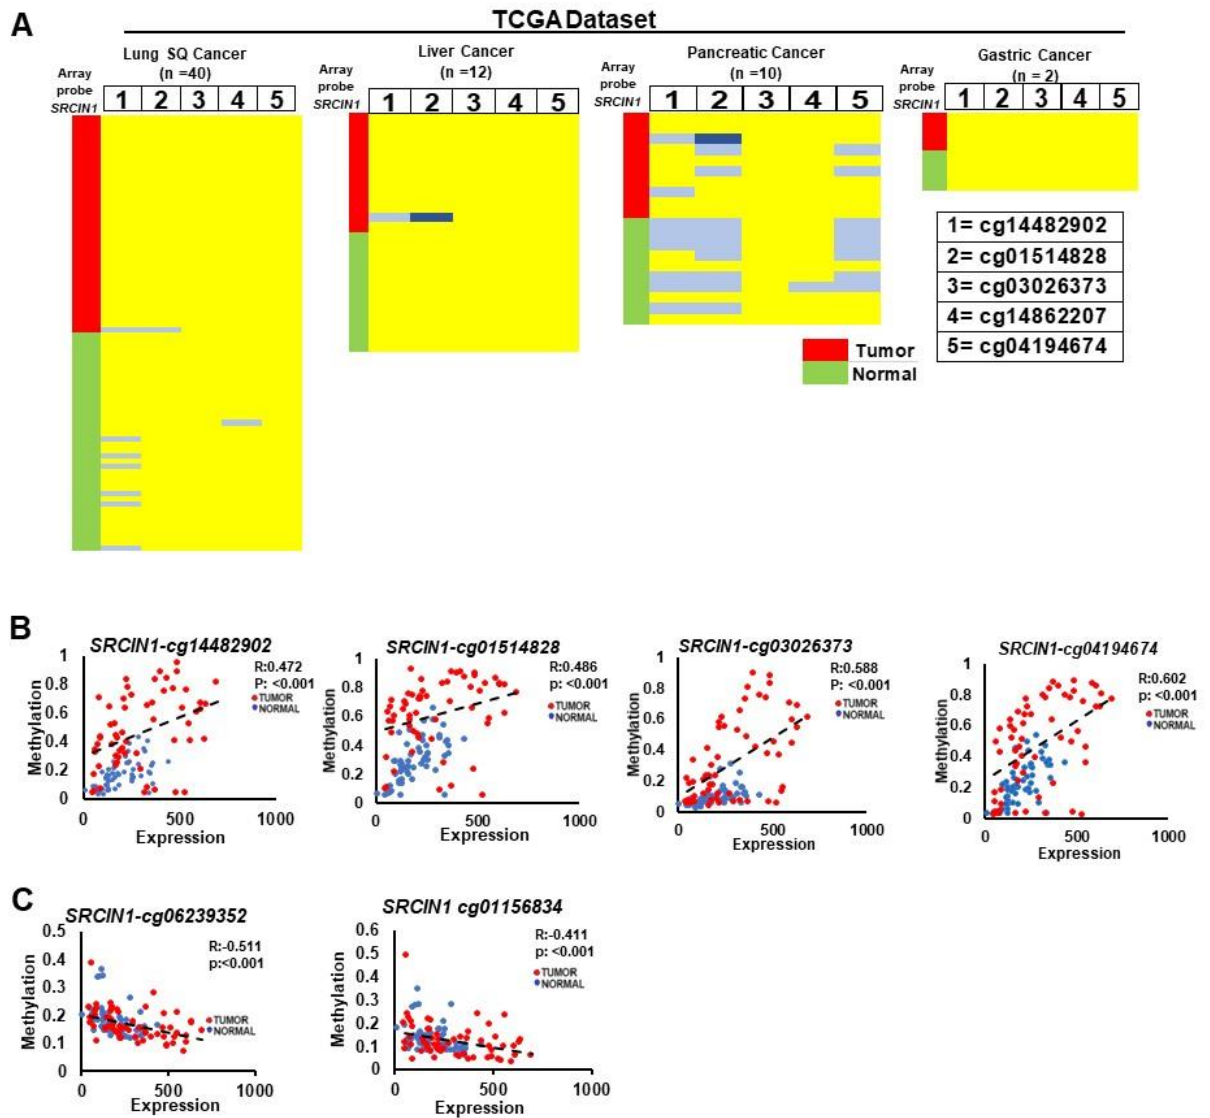

**Figure S3. *SRCIN1* DNA methylation in different cancers.** Differentially methylated CpG heatmap of *SRCIN1* (A) From TCGA dataset lung, liver cancer, pancreatic, and gastric cancer. Pearson correlation analysis of tissues between DNA methylation and RNA sequencing in 87 paired adjacent normal tissue samples and 87 paired breast cancer tissues from patients (B) Gene body (C) Promoter sites.



**Table S1.** List primer sequences and their reaction conditions used in the present study.

| Gene      | Primer         | 5'→3'sequences                 | Application         |
|-----------|----------------|--------------------------------|---------------------|
| ACTB      | Forward primer | TGGTGATGGAGGAGGTTTAGTAAGT      | MSP-M               |
|           | Reverse primer | AACCAATAAAACCTACTCCTCCCTTAA    |                     |
|           | Probe          | ACCACCACCCAACACACAATAACAAACACA |                     |
| SRCIN1    | Forward primer | GTATGTTTATGGTGAGTTTTTGCGG      |                     |
|           | Reverse primer | CAAAAATACTATTCTTACAATTTCGAA    |                     |
|           | Probe          | TGTTTAGGTTGTTGATTTCGTGCGT      |                     |
| GAPDH     | Forward primer | AGCCACATCGCTCAGACAC            | RT-PCR<br>Real-time |
|           | Reverse primer | GCCAATACGACCAAATCC             |                     |
| SRCIN1    | Forward primer | AGCCCCGACAAAAGCAAA             |                     |
|           | Reverse primer | CCAAAGGAAGTCAATACAGGGATAG      |                     |
| CKS       | Forward primer | TGTTGTCGTGGATTTGGTGC           |                     |
|           | Reverse primer | TGCACCTCTCAGTGCCATT            |                     |
| CDK2      | Forward primer | GGCACGTACGGAGTTGTGTA           |                     |
|           | Reverse primer | CATCCAGCAGCGTGTCCA             |                     |
| CDK6      | Forward primer | TCTGATTACCTGCTCCGCGA           |                     |
|           | Reverse primer | CAGAATCATTGCACCTGAGGG          |                     |
| CYCLIN A  | Forward primer | CGGTCCTGGAAGTGGTTCA            |                     |
|           | Reverse primer | TGGGGCGATGTTTCTTCTCG           |                     |
| CYCLIN A2 | Forward primer | GGCGGTACTGAAGTCCGGG            |                     |
|           | Reverse primer | TTAAGGGGTGCAACCCGTCTC          |                     |
| SKP2      | Forward primer | TGGCTGAACATTTCACTACTCTC        |                     |
|           | Reverse primer | AGCAAAGTCTGCAGGGCAAA           |                     |
| CRM1      | Forward primer | TGCCGATCTGAAAGCCACTT           |                     |
|           | Reverse primer | TGGGCTCATTTTCGGTAGCAG          |                     |
| NCOA3     | Forward primer | GTGAGCTCCCAGGGTTTTCT           |                     |
|           | Reverse primer | CCACCCTCTGTTGTCGGAAG           |                     |
| P27KIP1   | Forward primer | ACCTGCAACCGACGATTCTT           |                     |
|           | Reverse primer | TTGGGGAACCGTCTGAAACA           |                     |



**Table S2.** *SRCIN1* methylation and expression level versus clinical parameters breast cancer patients; data were generated from TCGA datasets<sup>a</sup>.

| Characteristics          | N <sup>b</sup> (%) | <i>SRCIN1</i> Methylation <sup>c</sup> |            |            | <i>p</i> -value    | N (%)      | <i>SRCIN1</i> mRNA Expression <sup>d</sup> |            |            | <i>p</i> -value    |
|--------------------------|--------------------|----------------------------------------|------------|------------|--------------------|------------|--------------------------------------------|------------|------------|--------------------|
|                          |                    | Low (%)                                | Normal (%) | High (%)   |                    |            | Low (%)                                    | Normal (%) | High (%)   |                    |
| <b>Overall</b>           | 640                |                                        |            |            |                    | 755        |                                            |            |            |                    |
| <b>Tumor Stage</b>       |                    |                                        |            |            | 0.673              |            |                                            |            |            | 0.048 <sup>c</sup> |
| I and II                 | 309 (70.5)         | 62 (20.1)                              | 52 (16.8)  | 195 (63.1) |                    | 373 (71.3) | 54 (14.5)                                  | 150 (40.2) | 169 (45.3) |                    |
| III and IV               | 129 (29.5)         | 26 (20.2)                              | 27 (20.9)  | 76 (58.9)  |                    | 150 (28.7) | 10 (6.7)                                   | 66 (44.0)  | 74 (49.3)  |                    |
| <b>Tumor size</b>        |                    |                                        |            |            |                    |            |                                            |            |            | 0.004 <sup>c</sup> |
| <65                      | 449 (72.6)         | 91 (20.3)                              | 83 (18.5)  | 275 (61.2) | 0.293              | 542 (72.4) | 66 (12.2)                                  | 245 (45.2) | 231 (42.6) |                    |
| ≥65                      | 169 (27.4)         | 25 (14.8)                              | 31 (18.3)  | 113 (66.9) |                    | 207 (27.6) | 24 (11.6)                                  | 68 (32.9)  | 115 (55.6) |                    |
| <b>Histological Type</b> |                    |                                        |            |            |                    |            |                                            |            |            | 0.000 <sup>c</sup> |
| IDC                      | 397 (71.3)         | 77 (19.4)                              | 64 (16.1)  | 256 (64.5) | 0.020 <sup>b</sup> | 170 (24.7) | 4 (2.4)                                    | 53 (31.2)  | 113 (66.5) |                    |
| ILC                      | 152 (27.3)         | 27 (17.8)                              | 34 (22.4)  | 91 (59.9)  |                    | 492 (71.6) | 73 (14.8)                                  | 219 (44.5) | 200 (40.7) |                    |
| Mixed type               | 8 (1.4)            | 5 (62.5)                               | 0 (0.0)    | 3 (37.5)   |                    | 25 (3.6)   | 1 (4.0)                                    | 17 (68.0)  | 7 (28.0)   |                    |
| <b>Tumor size</b>        |                    |                                        |            |            | 0.321              |            |                                            |            |            | 0.473              |
| T0–T1                    | 114 (25.9)         | 19 (16.7)                              | 19 (16.7)  | 76 (66.7)  |                    | 135 (25.6) | 13 (9.6)                                   | 60 (44.4)  | 62 (45.9)  |                    |
| T2–T4                    | 327 (24.1)         | 69 (21.1)                              | 61 (18.7)  | 197 (60.2) |                    | 392 (74.4) | 52 (13.3)                                  | 158 (40.3) | 182 (46.4) |                    |
| <b>Lymph nodes</b>       |                    |                                        |            |            | 0.990              |            |                                            |            |            | 0.535              |
| N0                       | 198 (45.1)         | 40 (20.2)                              | 35 (17.7)  | 123 (62.1) |                    | 237 (45.2) | 25 (10.5)                                  | 99 (41.8)  | 113 (47.7) |                    |
| N1–N3                    | 241 (54.9)         | 48 (19.9)                              | 44 (18.3)  | 149 (61.8) |                    | 287 (54.8) | 39 (13.6)                                  | 120 (41.8) | 128 (44.6) |                    |
| <b>Race</b>              |                    |                                        |            |            | 0.074              |            |                                            |            |            | 0.429              |
| White                    | 338 (78.4)         | 75 (86.2)                              | 61 (18.0)  | 202 (59.8) |                    | 413 (79.9) | 53 (12.8)                                  | 165 (40.0) | 195 (47.2) |                    |
| American                 | 30 (7.0)           | 5 (16.7)                               | 9 (30.0)   | 16 (53.3)  |                    | 72 (13.9)  | 7 (9.7)                                    | 32 (44.4)  | 33 (45.8)  |                    |
| Asian                    | 63 (14.6)          | 7 (11.1)                               | 9 (14.3)   | 47 (74.6)  |                    | 32 (6.2)   | 3 (9.4)                                    | 18 (56.3)  | 11 (34.4)  |                    |
| <b>Menopause State</b>   |                    |                                        |            |            | 0.695              |            |                                            |            |            | 0.124              |
| Premenopaus e            | 7 (14.9)           | 1 (14.3)                               | 3 (42.9)   | 3 (42.9)   |                    | 121 (25.7) | 18 (14.9)                                  | 55 (45.5)  | 48 (39.7)  |                    |
| Perimenopau se           | 5 (10.6)           | 2 (40.0)                               | 0 (0.0)    | 3 (60.0)   |                    | 16 (3.4)   | 3 (18.8)                                   | 9 (56.3)   | 4 (25.0)   |                    |
| Postmenopa use           | 35 (74.5)          | 6 (17.1)                               | 11 (31.4)  | 18 (51.4)  |                    | 333 (70.9) | 37 (11.1)                                  | 129 (38.7) | 167 (50.2) |                    |

|                      |               |           |           |               |       |            |           |            |                    |
|----------------------|---------------|-----------|-----------|---------------|-------|------------|-----------|------------|--------------------|
| <b>Metastasis</b>    |               |           |           |               | 0.522 |            |           |            | 0.091              |
| M0                   | 376<br>(98.2) | 74 (19.7) | 70 (18.6) | 232<br>(61.7) |       | 449 (98.0) | 59 (13.1) | 191 (42.5) | 199<br>(44.3)      |
| M1                   | 7 (1.8)       | 1 (14.3)  | 0 (0.0)   | 6 (85.7)      |       | 9 (2.0)    | 1 (11.1)  | 7 (77.8)   | 1 (11.1)           |
| <b>Tumor Markers</b> |               |           |           |               | 0.081 |            |           |            | 0.000 <sup>c</sup> |
| Estrogen             |               |           |           |               |       |            |           |            |                    |
| Negative             | 101<br>(22.9) | 17 (16.8) | 15 (14.9) | 69 (68.3)     |       | 116 (22.1) | 40 (34.5) | 50 (43.1)  | 26 (22.4)          |
| Positive             | 340<br>(77.1) | 71 (20.9) | 66 (19.4) | 203 (59.7)    |       | 408 (77.9) | 24 (5.9)  | 166 (40.7) | 218<br>(53.4)      |
| Progesterone         |               |           |           |               | 0.759 |            |           |            | 0.000 <sup>c</sup> |
| Negative             | 141<br>(32.0) | 28 (19.9) | 23 (16.3) | 90 (63.8)     |       | 164 (31.4) | 43 (26.2) | 69 (42.1)  | 52 (31.7)          |
| Positive             | 299<br>(68.0) | 60 (20.1) | 58 (19.4) | 181 (60.5)    |       | 358 (68.6) | 21 (5.9)  | 145 (40.5) | 192<br>(53.6)      |
| HER2                 |               |           |           |               | 0.609 |            |           |            | 0.001 <sup>c</sup> |
| Negative             | 247<br>(84.9) | 53 (21.5) | 44 (17.8) | 150 (60.7)    |       | 292 (64.6) | 47 (16.1) | 132 (45.2) | 113<br>(38.7)      |
| Positive             | 44 (15.1)     | 7 (15.9)  | 11 (25.0) | 26 (59.1)     |       | 56 (12.4)  | 3 (5.4)   | 16 (28.6)  | 37 (66.1)          |
| Equivoc              |               |           |           |               |       | 104 (23.0) | 9 (8.7)   | 40 (38.5)  | 55 (52.9)          |
| <b>Subtypes</b>      |               |           |           |               | 0.374 |            |           |            | 0.000 <sup>c</sup> |
| TNBC                 |               |           |           |               |       |            |           |            |                    |
| Negative             | 237<br>(81.7) | 50 (21.1) | 48 (20.3) | 139 (58.6)    |       | 690 (92.0) | 64 (9.3)  | 289 (41.9) | 337<br>(48.8)      |
| Positive             | 53 (18.3)     | 10 (18.9) | 7 (13.2)  | 36 (67.9)     |       | 60 (8.0)   | 26 (43.3) | 25 (41.7)  | 9 (15.0)           |
| Luminal A            |               |           |           |               | 0.498 |            |           |            | 0.000 <sup>c</sup> |
| Negative             | 97 (33.4)     | 17 (17.5) | 18 (18.6) | 62 (63.9)     |       | 116 (33.5) | 29 (25.0) | 41 (35.3)  | 46 (39.7)          |
| Positive             | 193<br>(66.6) | 43 (22.3) | 37 (19.2) | 113 (58.5)    |       | 230 (66.5) | 21        | 105 (9.1)  | 104 (45.7)         |
| Luminal B            |               |           |           |               | 0.283 |            |           |            | 0.448              |
| Negative             | 230<br>(79.3) | 52 (22.6) | 43 (18.7) | 135 (58.7)    |       | 267 (77.2) | 36 (13.5) | 117 (43.8) | 114<br>(42.7)      |
| Positive             | 60 (20.7)     | 8 (13.3)  | 12 (20.0) | 40 (66.7)     |       | 79 (22.8)  | 14 (17.7) | 29 (36.7)  | 36 (45.6)          |

<sup>a</sup>These results were analyzed by Pearson's X2 test.

<sup>b</sup>For some categories, the number of samples (n) was lower than the overall number analyzed because clinical data were unavailable for those samples.

<sup>c</sup>*SRCIN1* methylation was considered hypermethylation when the *SRCIN1* methylation level was more than two in breast tumors compared to adjacent normal breast tissues.

<sup>d</sup>*SRCIN1* was considered high when the *SRCIN1* expression level was more than two in breast tumors compared to adjacent normal breast tissues.
